# Supplementary material
Source: PubMed Central journal article supplement (PMC3373166)
Supplement: NIHMS370768-supplement-02.pdf [file NIHMS370768-supplement-02.pdf]

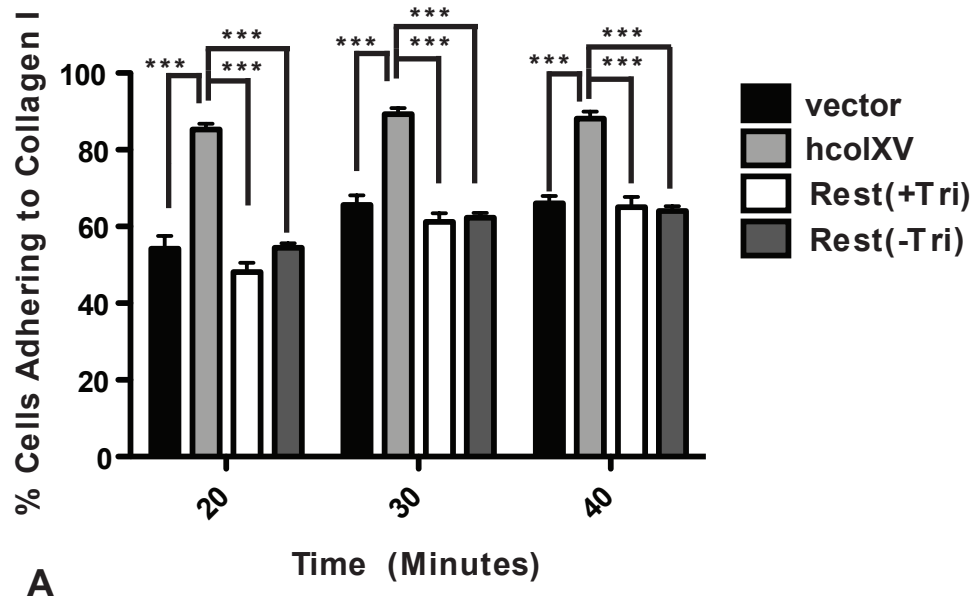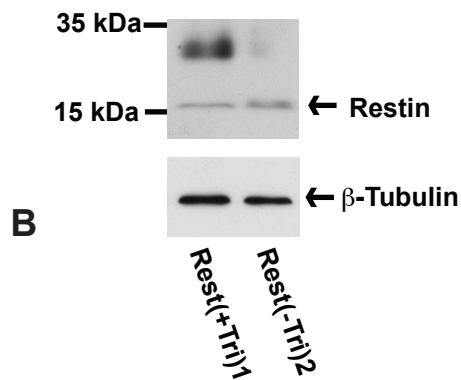

**Supplementary Figure 1. A.** D98AP2 restin clones with or without the N-terminal trimerization domain adhere to collagen I to the same degree, equivalent to the vector control clones and significantly less than clones expressing full length hcolXV. Pooled data from: 1 vector control (DP3); 1 hcolXV expressing clone (15:58); 3 Rest (+Tri) clones (Rest(+Tri)1, Rest(+Tri)5, Rest(+Tri)7; and 3 Rest(-Tri) clones (Rest(-Tri)4, Rest(-Tri)11, Rest(-Tri)12. n=4; each clone in triplicate; \*\*\*p<0.001; Two-way Anova and unpaired t- test with Mann-Whitney test. **B.** The cleaved form of restin is equivalent in clones expressing N-terminal region of NC10 or just the restin domain. Western blots probed with anti-colXV Ab or anti- $\beta$  tubulin Ab.
