# Supplementary material
Source: PubMed Central journal article supplement (PMC3373166)
Supplement: NIHMS370768-supplement-03.pdf [file NIHMS370768-supplement-03.pdf]

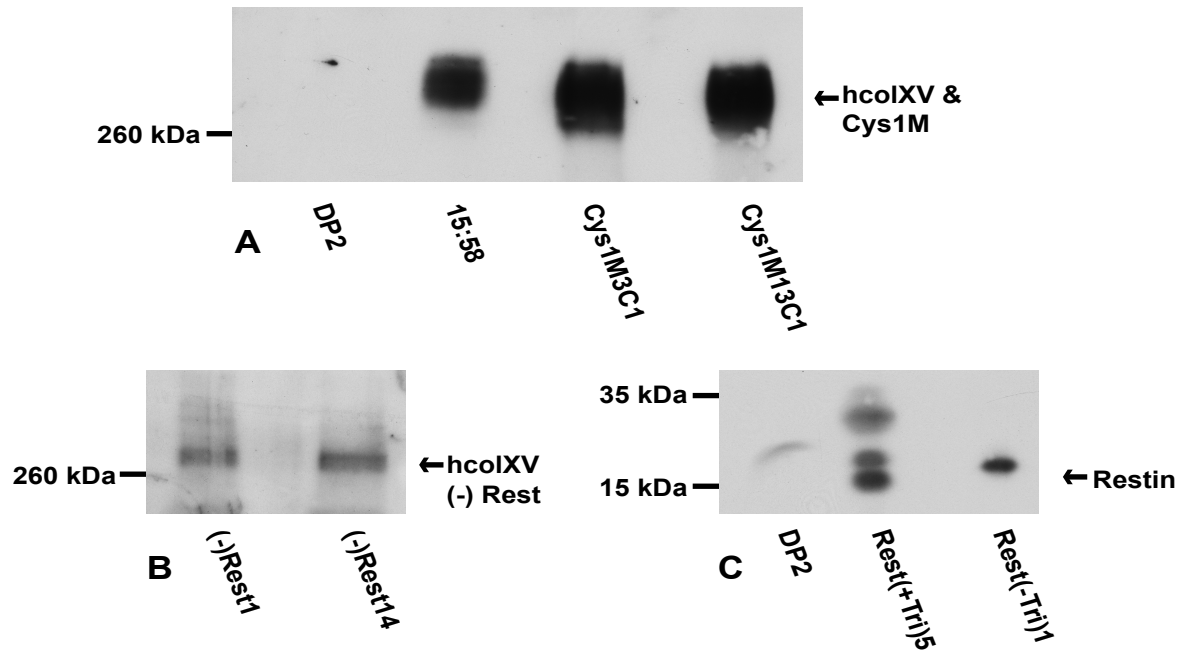

**Supplementary Figure 2.** HcolXV and all derivative constructs generated here are secreted into the cell culture supernatant. DP2 vector control; 15:58 hcolXV; Cys1M cysteine 733 mutant; (-Rest) hcolXV aa 1-1129 without the C terminus; Rest(+)Tri includes the collagen XV signal sequence (amino acids 1-27), followed by a large part of NC10 (1130-1388) including the trimerization domain; Rest(-)Tri contains aa 1-27 and 1206-1388, thus just encompassing the restin domain C-terminal region and lacking the trimerization domain. Western blots of concentrated media probed with C-terminal anti-colXV Ab (A, C) or M2 anti-FLAG Ab (B).
